# Supplementary material
Source: Springer Nature journal article supplement (https://www.springermedizin.de/resource/supplementary/12992_2013_276_MOESM2_ESM.pdf/9616254)
Supplement: MOESM2 [file 9616254]



## Community empowerment

|          |                                                                                      | 3. Ownership                                                                                                                                                              |                                                                                                                                                         | 4. Sustainability                                                                                                                                                        |
|----------|--------------------------------------------------------------------------------------|---------------------------------------------------------------------------------------------------------------------------------------------------------------------------|---------------------------------------------------------------------------------------------------------------------------------------------------------|--------------------------------------------------------------------------------------------------------------------------------------------------------------------------|
|          |                                                                                      | 2. Involvement                                                                                                                                                            |                                                                                                                                                         |                                                                                                                                                                          |
|          |                                                                                      | 1. Engagement                                                                                                                                                             |                                                                                                                                                         |                                                                                                                                                                          |
| Process  | Activities carried out mainly by project staff, responding to needs of the community | <p>Project staff gradually 'retreat' as the community begins to take a more active role</p> <p>Enabling environment created through involvement of other stakeholders</p> | <p>Community develops &amp; implements own strategies</p> <p>Formation of democratic structures &amp; community - based organisation (CBO)</p>          | <p>Broader social engagement</p> <p>Community acceptance leads to protection</p> <p>Focus on long term, sustainable intervention</p>                                     |
| Examples | Establishing a drop-in centre as a 'safe space' for FSW                              | <p>FSW hold own formalised meetings to problem-solve</p> <p>FSW build rapport with lodge owners to increase protection from violence</p>                                  | <p>FSW obtain legal literacy &amp; training to handle crises on their own</p> <p>Rapid response team made up entirely of FSW; no more project staff</p> | <p>FSW establish a 'self-regulatory board' to identify &amp; assist trafficked women &amp; minors in SW</p> <p>Capacity building with other marginalised communities</p> |
| Duration | 3-6 months                                                                           | 1-2 years                                                                                                                                                                 | 2-3 years                                                                                                                                               | On-going                                                                                                                                                                 |
|          |                                                                                      | FOR the community                                                                                                                                                         | BY the community                                                                                                                                        |                                                                                                                                                                          |
|          |                                                                                      | WITH the community                                                                                                                                                        |                                                                                                                                                         |                                                                                                                                                                          |
